# Supplementary material for: Oxidized single-walled carbon nanotubes and nanocones: a DFT study
Source: Royal Society of Chemistry journal article supplement (doi:10.1039/c7ra00301c), 2017-01-01
Supplement: c7ra00301c1.pdf [file c7ra00301c1.pdf]

# Oxidized single-walled carbon nanotubes and nanocones: A DFT study

Leonardo A. De Souza<sup>a</sup>, Antônio M. Da Silva, Jr.<sup>b</sup>, Hélio F. Dos Santos<sup>c</sup>, Wagner B. De Almeida<sup>\*a</sup>

<sup>a</sup> Laboratório de Química Computacional (LQC), Departamento de Química Inorgânica, Instituto de Química, Universidade Federal Fluminense, Campus do Valonguinho, Centro, Niterói, RJ 24020-141, Brazil.

<sup>b</sup> Laboratório de Compostos Funcionais Semicondutores (LCFS), Departamento de Química, Instituto de Ciências Exatas, Universidade Federal Rural do Rio de Janeiro – UFRRJ, BR-465, Km 7 Seropédica, Rio de Janeiro, 23.897-000, Brazil.

<sup>c</sup> Núcleo de Estudos em Química Computacional (NEQC), Departamento de Química, ICE, Universidade Federal de Juiz de Fora – UFJF, Campus Universitário Martelos, Juiz de Fora, MG, 36.036-330, Brazil.

## Supplementary Information

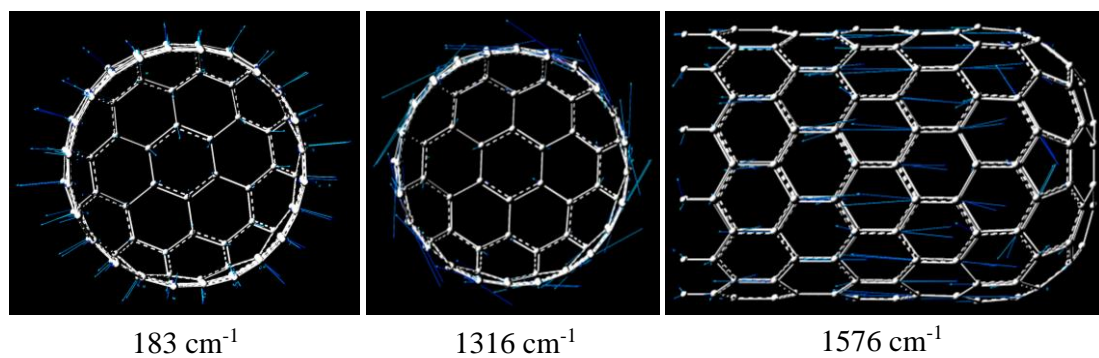

**S1.** Main Raman normal modes calculated at B3LYP/3-21G level for pristine CNT model.

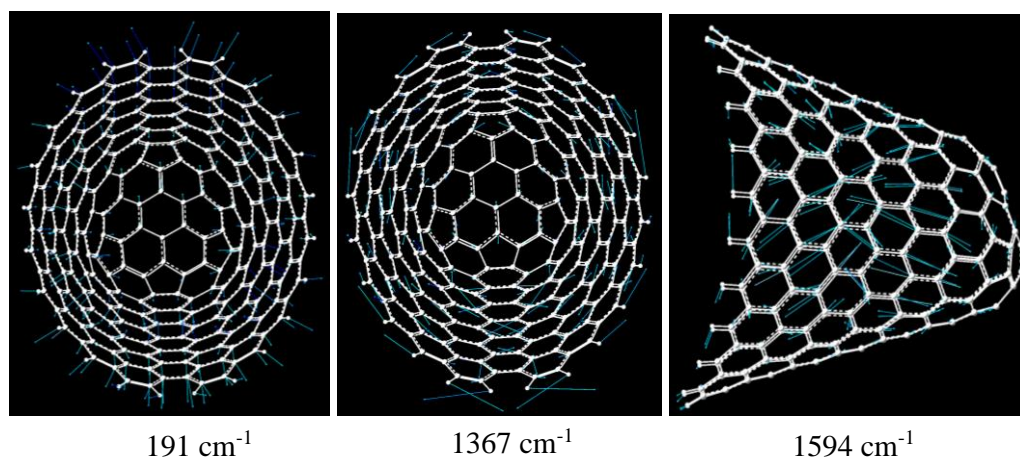

**S2.** Main Raman normal modes calculated at B3LY/3-21G level for pristine CNC model.
